# Supplementary material for: Retinal regeneration requires dynamic Notch signaling
Source: PubMed Central journal article supplement — Neural Regen Res. 2021 Nov 12;17(6):1199–209. doi: 10.4103/1673-5374.327326 (PMC8643038; doi:10.4103/1673-5374.327326), 2021-11-12
Supplement: NRR-17-1199_Suppl2.pdf [file NRR-17-1199_Suppl2.pdf]

## OPEN PEER REVIEW REPORT 2

**Name of journal:** Neural Regeneration Research

**Manuscript NO:** NRR-D-21-00370

**Title:** Retinal regeneration requires dynamic Notch signaling

**Reviewer's Name:** Lucia Poggi

**Reviewer's country:** Italy

### COMMENTS TO AUTHORS

I find this review entitled "Retinal regeneration requires dynamic Notch signaling" very exhaustive and informative on what is known so far about the very complex Notch signalling in neural development and regeneration.

This review will therefore be very useful for the researchers inside and outside the field.

I only have one suggestion:

The authors did outline very nicely acquired knowledges on Notch signalling both in development and regeneration. Perhaps it would be also useful to implement the manuscript with a table similar to table 1, in which the authors briefly outline the key findings, at the same time as highlighting the gaps to be filled, for example indicating known developmental processes that need to be still translated to the regenerative ones.
